# Supplementary material for: Estrogen modulation of pain perception with a novel 17β-estradiol pretreatment regime in ovariectomized rats
Source: Biol Sex Differ. 2020 Jan 9;11:2. doi: 10.1186/s13293-019-0271-5 (PMC6953313; doi:10.1186/s13293-019-0271-5)
Supplement: Supplementary file 1 — Additional file 1: Table S1. Spontaneous behavioral results of rats in different hormone states. [file 13293_2019_271_MOESM1_ESM.docx]

Table S1. Total duration (d) or frequency (f) of spontaneous behaviors recorded in rats of different hormone states.

| Day 7 after OVX   | Behavior | control | OVX | OVX+E | | --- | --- | --- | --- | | Exploration (d) | 1723±257 | 1086±123 | 1578.8±283.4 | | Internal crossing (f) | 174.6±59.4 | 59±6.8 | 147.4±28.6 | | External crossing (f) | 598.6±40.5 | 342±29.7 | 469±74.3 | | Rearing (f)  Grooming (d) | 134.6±20.8  601.9±136.7 | 58±6.8  987±135.5 | 115.7±34.6  651.8±165.4 | |
| --- | --- | --- | --- | --- | --- | --- | --- | --- | --- | --- | --- | --- | --- | --- | --- | --- | --- | --- | --- | --- |

Data are expressed as mean ±SD.

| Day 14 after OVX   | Behavior | control | OVX | OVX+E | | --- | --- | --- | --- | | Exploration (d) | 1895±291 | 1129±183 | 1693±293.2 | | Internal crossing (f) | 165.6±48.5 | 83±7.4 | 162.6±35.3 | | External crossing (f) | 573.5±37.5 | 372±58.3 | 519±84.3 | | Rearing (f)  Grooming (d) | 120.5±35.2  638.0±143.2 | 82±6.3  1032±153.3 | 104.3±28.4  704.3±173.4 | |
| --- | --- | --- | --- | --- | --- | --- | --- | --- | --- | --- | --- | --- | --- | --- | --- | --- | --- | --- | --- | --- |

Data are expressed as mean ±SD.

| Day 28 after OVX   | Behavior | control | OVX | OVX+E | | --- | --- | --- | --- | | Exploration (d) | 1692±314 | 1057±193 | 1593±268.5 | | Internal crossing (f) | 187.3±52.3 | 93±7.9 | 157.3±45.2 | | External crossing (f) | 610.3±38.3 | 385±62.8 | 586.8±98.4 | | Rearing (f)  Grooming (d) | 209.4±29.8  610.6±184.6 | 92±9.3  1104±182.3 | 114.6±36.9  736.6±184.2 | |
| --- | --- | --- | --- | --- | --- | --- | --- | --- | --- | --- | --- | --- | --- | --- | --- | --- | --- | --- | --- | --- |

Data are expressed as mean ±SD.

| Day 35 after OVX   | Behavior | control | OVX | OVX+E | | --- | --- | --- | --- | | Exploration (d) | 1902±328 | 1047±137 | 1785±262.4 | | Internal crossing (f) | 138.4±52.7 | 92.6±11.4 | 197.2±36.5 | | External crossing (f) | 519.3±84.3 | 410±67.8 | 420.6±73.6 | | Rearing (f)  Grooming (d) | 110.3±25.7  610.2±184.2 | 65±4.7  993.2±152.6 | 98.3±21.5  682.5±183.2 | |
| --- | --- | --- | --- | --- | --- | --- | --- | --- | --- | --- | --- | --- | --- | --- | --- | --- | --- | --- | --- | --- |

Data are expressed as mean ±SD.
